# Supplementary material for: Significance of the Number and the Location of Metastatic Lymph Nodes in Locally Recurrent or Persistent Cervical Cancer Patients Treated with Salvage Hysterectomy plus Lymphadenectomy
Source: MDPI journal article supplement (doi:10.3390/curroncol29070385), 2022-07-11
Supplement: s1 [file s1]

Table S1. Clinicopathological characteristics of the patients according to lymph node metastasis.

|                                               |                            | Node-negative<br>group (n=29)<br>N (%) | Node-positive<br>group (n=21)<br>N (%) | P-value |
|-----------------------------------------------|----------------------------|----------------------------------------|----------------------------------------|---------|
| Initial characteristics                       |                            |                                        |                                        |         |
| Initial stage <sup>a</sup>                    | IB1-IIA2                   | 4 (13.8)                               | 1 (4.8)                                | 0.3982  |
|                                               | IIB-IIIA                   | 14 (48.3)                              | 8 (38.1)                               |         |
|                                               | IIIB-IVA                   | 9 (31.0)                               | 8 (38.1)                               |         |
|                                               | IVB                        | 2 (6.9)                                | 4 (19.1)                               |         |
| Histology                                     | SCC                        | 15 (51.7)                              | 15 (71.4)                              | 0.1604  |
|                                               | AC                         | 14 (48.3)                              | 6 (28.6)                               |         |
| Types of radiotherapy                         | Pelvic EBRT +<br>ICBT      | 25 (86.2)                              | 19 (90.5)                              | 0.4542  |
|                                               | EFRT + ICBT                | 2 (6.9)                                | 2 (9.5)                                |         |
|                                               | Pelvic ERBT alone          | 2 (6.9)                                | 0                                      |         |
| Concurrent chemotherapy                       | Yes                        | 28 (96.6)                              | 20 (95.2)                              | 0.8150  |
|                                               | No                         | 1 (3.5)                                | 1 (4.8)                                |         |
| Post recurrence characteristics               |                            |                                        |                                        |         |
| Age                                           | ≤ 39                       | 5 (17.2)                               | 3 (14.3)                               | 0.9612  |
|                                               | 40-64                      | 20 (69.0)                              | 15 (71.4)                              |         |
|                                               | 65 ≤                       | 4 (13.8)                               | 3 (14.3)                               |         |
| Disease status                                | Recurrent cancer           | 8 (27.6)                               | 5 (23.8)                               | 0.7638  |
|                                               | Persistent cancer          | 21 (72.4)                              | 16 (76.2)                              |         |
| BMI                                           | < 20.0                     | 12 (41.4)                              | 11 (52.4)                              | 0.4411  |
|                                               | ≥ 20.0                     | 17 (58.6)                              | 10 (47.6)                              |         |
| Tumor diameter (mm) <sup>b</sup>              | < 10                       | 10 (34.5)                              | 2 (9.5)                                | 0.0704  |
|                                               | 10-20                      | 3 (10.3)                               | 1 (4.8)                                |         |
|                                               | 20 ≤                       | 16 (55.2)                              | 18 (85.7)                              |         |
| NAC                                           | No                         | 27 (93.1)                              | 20 (95.2)                              | 0.7538  |
|                                               | Yes                        | 2 (6.9)                                | 1 (4.8)                                |         |
| Surgery performed                             | Piver type I               | 1 (3.5)                                | 2 (9.5)                                | 0.3719  |
|                                               | Piver type II or<br>grater | 28 (96.6)                              | 19 (90.5)                              |         |
| Pathological findings from salvage<br>surgery |                            |                                        |                                        |         |
| Parametrial invasion                          | Negative                   | 23 (79.3)                              | 12 (57.1)                              | 0.0914  |
|                                               | Positive                   | 6 (20.7)                               | 9 (42.9)                               |         |
| Surgical margins                              | Negative                   | 26 (89.6)                              | 12 (57.1)                              | 0.0079  |
|                                               | Close or positive          | 3 (10.3)                               | 9 (42.9)                               |         |
| Stromal invasion                              | Less than half             | 14 (48.3)                              | 8 (38.1)                               | 0.4741  |
|                                               | More than half             | 15 (51.7)                              | 13 (61.9)                              |         |
| LSVI                                          | Negative                   | 18 (62.1)                              | 7 (33.3)                               | 0.0449  |
|                                               | Positive                   | 11 (37.9)                              | 14 (66.7)                              |         |
| Peritoneal cytology <sup>c</sup>              | Negative                   | 27 (100)                               | 17 (89.5)                              | 0.0848  |
|                                               | Positive                   | 0                                      | 2 (10.5)                               |         |
| Adjuvant treatments after surgery             | No                         | 22 (75.9)                              | 7 (33.3)                               | 0.0026  |
|                                               | Yes                        | 7 (24.1)                               | 14 (66.7)                              |         |
| Symptom status                                | No                         | 17 (58.6)                              | 12 (57.1)                              | 0.9168  |
|                                               | Yes                        | 12 (41.4)                              | 9 (42.9)                               |         |

SCC, squamous cell carcinoma; AC, adenocarcinoma; EBRT, external beam radiotherapy; ICBT, intracavitary brachytherapy; EFRT, extended-field radiotherapy; NAC, neoadjuvant chemotherapy; LSVI, lymphovascular space involvement; BMI, body mass index.

<sup>a</sup> FIGO 2008 staging system.

<sup>b</sup> Assessed using preoperative pelvic MRI at the time of recurrence diagnosis.

<sup>c</sup> Four patients who did not undergo peritoneal cytology were excluded.

Table S2. Surgical outcomes

|                                    |                     | All patients<br>(N=50)<br>N (%) | Node-negative group<br>(N=29)<br>N (%) | Node-positive group<br>(N=21)<br>N (%) | P-value |
|------------------------------------|---------------------|---------------------------------|----------------------------------------|----------------------------------------|---------|
| Surgical time (min)                | Median (range)      | 460 (155-729)                   |                                        |                                        |         |
|                                    | < 480               | 32 (64.0)                       | 20 (69.0)                              | 12 (57.1)                              | 0.3900  |
|                                    | ≥ 480               | 18 (36.0)                       | 9 (31.0)                               | 9 (42.9)                               |         |
| Blood loss (ml)                    | Median (range)      | 1350 (280-5335)                 |                                        |                                        |         |
|                                    | < 1500              | 27 (54.0)                       | 18 (62.1)                              | 9 (42.9)                               | 0.1785  |
|                                    | ≥ 1500              | 23 (46.0)                       | 11 (37.9)                              | 12 (57.1)                              |         |
| Blood transfusion                  | No                  | 26 (52.0)                       | 17 (58.6)                              | 9 (42.9)                               | 0.2708  |
|                                    | Yes                 | 24 (48.0)                       | 12 (41.4)                              | 12 (57.1)                              |         |
| Surgical complications (Grade 3-4) | Early complications | 2 (4.0)                         | 1 (3.5)                                | 1 (4.8)                                | 0.8150  |
|                                    | Late complications  | 14 (28.0)                       | 9 (31.0)                               | 5 (23.8)                               | 0.5744  |

Table S3. Clinicopathological characteristics of the patients according to the number of lymph node metastasis.

|                                            |                         | 1-2 nodes metastasis (n=10) | Multiple (≥3) nodes metastasis (n=11) | P-value |
|--------------------------------------------|-------------------------|-----------------------------|---------------------------------------|---------|
|                                            |                         | N (%)                       | N (%)                                 |         |
| Initial characteristics                    |                         |                             |                                       |         |
| Initial stage <sup>a</sup>                 | IB1-IIA2                | 1 (10.0)                    | 0                                     | 0.5814  |
|                                            | IIB-IIIA                | 4 (40.0)                    | 4 (36.4)                              |         |
|                                            | IIIB-IVA                | 4 (40.0)                    | 4 (36.4)                              |         |
|                                            | IVB                     | 1 (10.0)                    | 3 (27.3)                              |         |
| Histology                                  | SCC                     | 10 (100)                    | 5 (45.5)                              | 0.0057  |
|                                            | AC                      | 0                           | 6 (54.6)                              |         |
| Types of radiotherapy                      | Pelvic EBRT + ICBT      | 9 (90.0)                    | 10 (90.9)                             | 0.9435  |
|                                            | EFRT + ICBT             | 1 (10.0)                    | 1 (9.1)                               |         |
|                                            | Pelvic ERBT alone       | 0                           | 0                                     |         |
| Concurrent chemotherapy                    | Yes                     | 9 (90.0)                    | 11(100)                               | 0.2825  |
|                                            | No                      | 1 (10.0)                    | 0                                     |         |
| Post recurrence characteristics            |                         |                             |                                       |         |
| Age                                        | ≤ 39                    | 2 (20.0)                    | 1 (9.1)                               | 0.7092  |
|                                            | 40-64                   | 7 (70.0)                    | 8 (72.7)                              |         |
|                                            | 65 ≤                    | 1 (10.0)                    | 2 (18.2)                              |         |
| Disease status                             | Recurrent cancer        | 6 (60.0)                    | 10 (90.9)                             | 0.0967  |
|                                            | Persistent cancer       | 4 (40.0)                    | 1 (9.1)                               |         |
| BMI                                        | < 20.0                  | 6 (60.0)                    | 5 (45.5)                              | 0.5051  |
|                                            | ≥ 20.0                  | 4 (40.0)                    | 6 (54.6)                              |         |
| Tumor diameter (mm) <sup>b</sup>           | < 10                    | 2 (20.0)                    | 0                                     | 0.2037  |
|                                            | 10-20                   | 0                           | 1 (9.1)                               |         |
|                                            | 20 ≤                    | 8 (80.00)                   | 10 (90.9)                             |         |
| NAC                                        | No                      | 9 (90.0)                    | 11 (100)                              | 0.2825  |
|                                            | Yes                     | 1 (10.0)                    | 0                                     |         |
| Surgery performed                          | Piver type I            | 0                           | 2 (18.2)                              | 0.1563  |
|                                            | Piver type II or grater | 10 (100)                    | 9 (81.8)                              |         |
| Pathological findings from salvage surgery |                         |                             |                                       |         |
| Parametrial invasion                       | Negative                | 8 (80.0)                    | 4 (36.4)                              | 0.0436  |
|                                            | Positive                | 2 (20.0)                    | 7 (63.6)                              |         |
| Surgical margins                           | Negative                | 8 (80.0)                    | 4 (36.4)                              | 0.0436  |
|                                            | Close or positive       | 2 (20.0)                    | 7 (63.6)                              |         |
| Stromal invasion                           | Less than half          | 7 (70.0)                    | 1 (9.1)                               | 0.0041  |
|                                            | More than half          | 3 (30.0)                    | 10 (90.9)                             |         |
| LSVI                                       | Negative                | 4 (40.0)                    | 3 (27.3)                              | 0.5366  |
|                                            | Positive                | 6 (27.3)                    | 8 (72.7)                              |         |
| Peritoneal cytology <sup>c</sup>           | Negative                | 9 (90.0)                    | 8 (88.9)                              | 0.9372  |
|                                            | Positive                | 1 (10.0)                    | 1 (11.1)                              |         |
| Adjuvant treatments after surgery          | No                      | 5 (50.0)                    | 2 (18.2)                              | 0.1224  |
|                                            | Yes                     | 5 (50.0)                    | 9 (81.8)                              |         |
| Symptom status                             | No                      | 6 (60.0)                    | 6 (54.6)                              | 0.8008  |
|                                            | Yes                     | 4 (40.0)                    | 5 (45.5)                              |         |

SCC, squamous cell carcinoma; AC, adenocarcinoma; EBRT, external beam radiotherapy; ICBT, intracavitary brachytherapy; EFRT, extended-field radiotherapy; NAC, neoadjuvant chemotherapy; LVSI, lymphovascular space involvement; BMI, body mass index.

<sup>a</sup> FIGO 2008 staging system.

<sup>b</sup> Assessed using preoperative pelvic MRI at the time of recurrence diagnosis.

<sup>c</sup> Four patients who did not undergo peritoneal cytology were excluded.

Table S4. Clinicopathological characteristics of the patients according to the location of lymph node metastasis.

|                                            |                         | PLN alone (n=15) | PLN+PALN (n=6) | P-value |
|--------------------------------------------|-------------------------|------------------|----------------|---------|
|                                            |                         | N (%)            | N (%)          |         |
| Initial characteristics                    |                         |                  |                |         |
| Initial stage <sup>a</sup>                 | IB1-IIA2                | 1 (6.7)          | 0              | 0.1278  |
|                                            | IIB-IIIA                | 7 (46.7)         | 1 (16.7)       |         |
|                                            | IIIB-IVA                | 6 (40.0)         | 2 (33.3)       |         |
|                                            | IVB                     | 1 (6.7)          | 3 (50.0)       |         |
| Histology                                  | SCC                     | 12 (80.0)        | 3 (50.0)       | 0.1692  |
|                                            | AC                      | 3 (20.0)         | 3 (50.0)       |         |
| Types of radiotherapy                      | Pelvic EBRT + ICBT      | 14 (93.3)        | 5 (83.3)       | 0.4807  |
|                                            | EFRT + ICBT             | 1 (6.7)          | 1 (16.7)       |         |
|                                            | Pelvic ERBT alone       | 0                | 0              |         |
| Concurrent chemotherapy                    | Yes                     | 14 (93.3)        | 6 (100)        | 0.5169  |
|                                            | No                      | 1 (6.7)          | 0              |         |
| Post recurrence characteristics            |                         |                  |                |         |
| Age                                        | ≤ 39                    | 2 (13.3)         | 1 (16.7)       | 0.4966  |
|                                            | 40-64                   | 10 (66.7)        | 5 (83.3)       |         |
|                                            | 65 ≤                    | 3 (20.0)         | 0              |         |
| Disease status                             | Recurrent cancer        | 4 (26.7)         | 1 (16.7)       | 0.6269  |
|                                            | Persistent cancer       | 11 (73.3)        | 5 (83.3)       |         |
| BMI                                        | < 20.0                  | 8 (53.3)         | 3 (50.0)       | 0.8901  |
|                                            | ≥ 20.0                  | 7 (46.7)         | 3 (50.0)       |         |
| Tumor diameter (mm) <sup>b</sup>           | < 10                    | 2 (13.3)         | 0              | 0.1915  |
|                                            | 10-20                   | 0                | 1 (16.7)       |         |
|                                            | 20 ≤                    | 13 (86.7)        | 5 (83.3)       |         |
| NAC                                        | No                      | 14 (93.3)        | 6 (100)        | 0.5169  |
|                                            | Yes                     | 1 (6.7)          | 0              |         |
| Surgery performed                          | Piver type I            | 2 (13.3)         | 0              | 0.3471  |
|                                            | Piver type II or grater | 13 (86.7)        | 6 (100)        |         |
| Pathological findings from salvage surgery |                         |                  |                |         |
| Parametrial invasion                       | Negative                | 9 (60.0)         | 3 (50.0)       | 0.6757  |
|                                            | Positive                | 6 (40.0)         | 3 (50.0)       |         |
| Surgical margins                           | Negative                | 10 (66.7)        | 2 (33.3)       | 0.1632  |
|                                            | Close or positive       | 5 (33.3)         | 4 (66.7)       |         |
| Stromal invasion                           | Less than half          | 7 (46.7)         | 1 (16.7)       | 0.2009  |
|                                            | More than half          | 8 (53.3)         | 5 (83.3)       |         |
| LSVI                                       | Negative                | 5 (33.3)         | 2 (33.3)       | 1.0000  |
|                                            | Positive                | 10 (66.7)        | 4 (66.7)       |         |
| Peritoneal cytology <sup>c</sup>           | Negative                | 13 (92.9)        | 4 (80.0)       | 0.4213  |
|                                            | Positive                | 1 (7.1)          | 1 (20.0)       |         |
| Adjuvant treatments after surgery          | No                      | 6 (40.0)         | 1 (16.7)       | 0.3055  |
|                                            | Yes                     | 9 (60.0)         | 5 (83.3)       |         |
| Symptom status                             | No                      | 10 (66.7)        | 2 (33.3)       | 0.1632  |
|                                            | Yes                     | 5 (33.3)         | 4 (66.7)       |         |

SCC, squamous cell carcinoma; AC, adenocarcinoma; EBRT, external beam radiotherapy; ICBT, intracavitary brachytherapy; EFRT, extended-field radiotherapy; NAC, neoadjuvant chemotherapy; LVSI, lymphovascular space involvement; BMI, body mass index..

<sup>a</sup> FIGO 2008 staging system.

<sup>b</sup> Assessed using preoperative pelvic MRI at the time of recurrence diagnosis.

<sup>c</sup> Two patients who did not undergo peritoneal cytology were excluded.
